# Supplementary material
Source: Springer Nature journal article supplement (https://www.springermedizin.de/resource/supplementary/13012_2009_262_MOESM1_ESM.pdf/9629584)
Supplement: MOESM1 [file 9629584]

a.

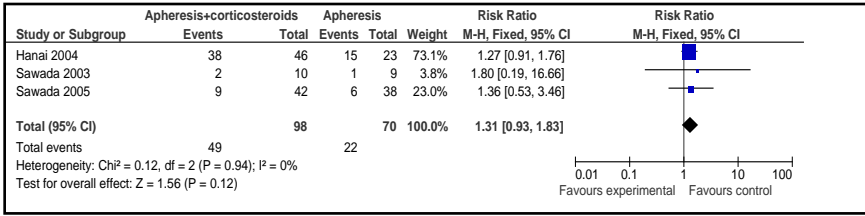

a.

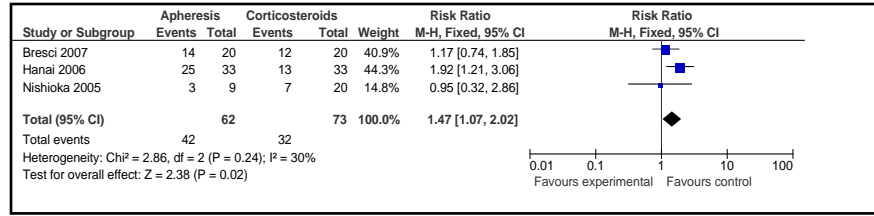

b.

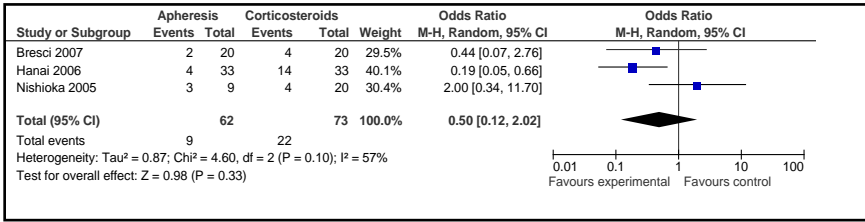

b.

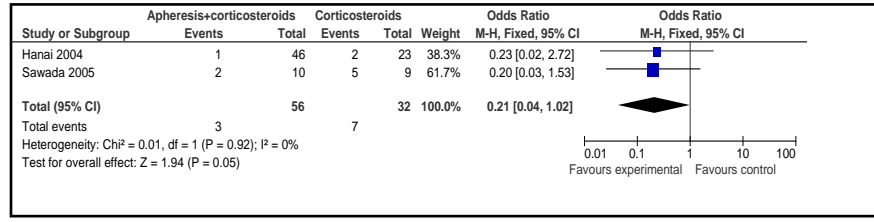

c.

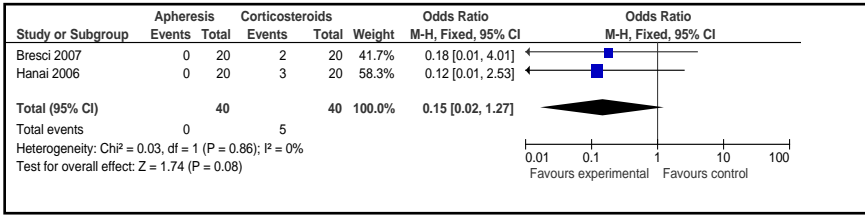

c.

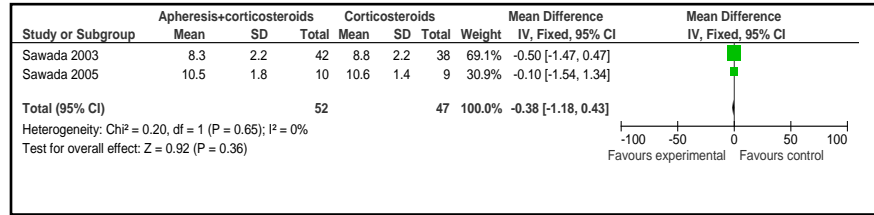

2.

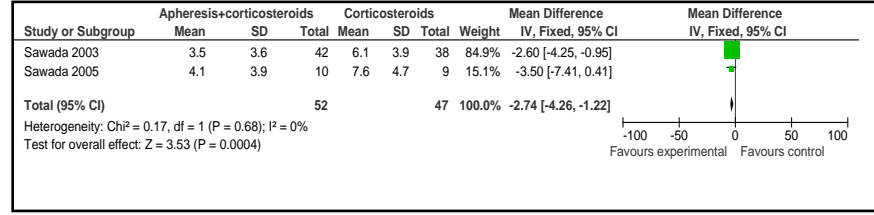

**A/ Results for the first question**

Metanalysis done for the following outcomes:

- a) Clinical remission;
- b) Percentage of patients with mild adverse effects;
- c) Percentage of patients with moderate to severe adverse effects

**B/ Results for the second question**

Metanalysis done for the following outcomes:

- a) Clinical remission;
- b) Colectomy Rate;
- c) Endoscopic Index (EI) mean before (1) and after (2) the treatment in both patient groups
